# Supplementary material for: Liquid crystalline and charge transport properties of novel non-peripherally octasubstituted perfluoroalkylated phthalocyanines
Source: Royal Society of Chemistry journal article supplement (doi:10.1039/c4tc02557a), 2014-12-30
Supplement: c4tc02557a1.pdf [file c4tc02557a1.pdf]

## Liquid crystalline and charge transport properties of novel non-peripherally octasubstituted perfluoroalkylated phthalocyanines

Lydia Sosa-Vargas,<sup>a</sup> Fabien Nekelson,<sup>a</sup> Daiju Okuda,<sup>c</sup> Minokazu Takahashi,<sup>a</sup> Yukimasa Matsuda,<sup>a</sup> Quang-Duy Dao,<sup>b</sup> Yoshida Hiroyuki,<sup>b</sup> Akihiko Fujii,<sup>b</sup> Masanori Ozaki,<sup>b</sup> & Yo Shimizu\*<sup>a</sup>

### ELECTRONIC SUPPORTING INFORMATION

**Table S1.** XRD lattice parameters of compounds **2** (a) and **3** (b) at both Col<sub>h</sub> and Col<sub>r</sub> mesophases

**Fig. S1.** Normalised UV-Visible spectra for compounds **1,2** and **3** in THF (C=1x10<sup>-5</sup>M).

**Fig. S2.** DSC curves of **3** at 1°C / min of heating and cooling rates.

**Fig. S3.** Detailed POM analysis of mesophase textures of **2** upon cooling (1°C/min) from the isotropic phase in which we can observe the homeotropic alignment at the Col<sub>h</sub> phase (a) followed by the Col<sub>r</sub> phase (b) with a *c2mm* symmetry which then rearranges into *p2gg* (c) until reaching its crystalline phase (d).

**Fig. S4.** XRD evidence for the symmetry rearrangement (*c2mm* to *p2gg*) occurring in the fluorinated phthalocyanine **2** as the columnar hexagonal phase collapses into Col<sub>r</sub> upon cooling (170 to 160°C).

**Fig. S5.** Nodal patterns of the a, s, -a and -s molecular orbitals (HOMO/LUMO) of the non-fluorinated phthalocyanine in B3LYP geometry optimisations with 6-31G(d) basis sets at an isosurface value of 0.03 au.

**Table S1.** XRD lattice parameters of mesophases for (a) **2** and (b) **3**

**a)**

| <b>T = 190 °C</b>                  |                           |                                   |
|------------------------------------|---------------------------|-----------------------------------|
| <b>Col<sub>h</sub>, a = 22.3 Å</b> |                           |                                   |
| <b>hk</b>                          | <b>d<sub>obs</sub>/ Å</b> | <b>d<sub>theoretical</sub>/ Å</b> |
| <b>10</b>                          | 19.32                     | 19.32                             |
| <b>11</b>                          | 11.16                     | 11.15                             |
| <b>20</b>                          | 9.77                      | 9.66                              |
|                                    | 5.5br                     |                                   |
|                                    | 4.5br                     |                                   |
| <b>Z</b>                           | 1.0                       | 1                                 |

| <b>T = 170 °C</b>                        |                           | <b>T = 160 °C</b>                                    |                           |                                   |
|------------------------------------------|---------------------------|------------------------------------------------------|---------------------------|-----------------------------------|
| <b>Col<sub>r</sub>(c2mm), a = 41.7 Å</b> |                           | <b>Col<sub>r</sub>(p2gg), a = 41.7 Å, b = 22.4 Å</b> |                           |                                   |
| <b>hk</b>                                | <b>d<sub>obs</sub>/ Å</b> | <b>hk</b>                                            | <b>d<sub>obs</sub>/ Å</b> | <b>d<sub>theoretical</sub>/ Å</b> |
| <b>11</b>                                | 19.62                     | <b>11</b>                                            | 19.70                     | 19.70                             |
| <b>20</b>                                | 20.82                     | <b>20</b>                                            | 20.87                     | 20.87                             |
| <b>13</b>                                | 7.28                      | <b>13</b>                                            | 7.28                      | 7.34                              |
| <b>22</b>                                | 9.76                      | <b>22</b>                                            | 9.82                      | 9.85                              |
| <b>40</b>                                | 10.38                     | <b>40</b>                                            | 10.35                     | 10.44                             |
|                                          | 5.4br                     | <b>32</b>                                            | 8.84                      | 8.71                              |
|                                          | 4.4sh, br                 | <b>52</b>                                            | 6.84                      | 6.69                              |
| <b>Z</b>                                 | 1.9                       |                                                      | 5.4br                     |                                   |
|                                          |                           |                                                      | 4.4sh, br                 |                                   |
|                                          |                           | <b>Z</b>                                             | 1.9                       | 2                                 |

**b)**

| <b>T = 155 °C</b>                  |                           |                                   |
|------------------------------------|---------------------------|-----------------------------------|
| <b>Col<sub>h</sub>, a = 21.7 Å</b> |                           |                                   |
| <b>hk</b>                          | <b>d<sub>obs</sub>/ Å</b> | <b>d<sub>theoretical</sub>/ Å</b> |
| <b>10</b>                          | 18.79                     | 18.79                             |
| <b>11</b>                          | 10.85                     | 10.85                             |
| <b>20</b>                          | 9.41                      | 9.40                              |
|                                    | 4.5br                     |                                   |
| <b>Z</b>                           | 1.1                       | 1                                 |

| <b>T = 140 °C</b>                                    |                           |                                   |
|------------------------------------------------------|---------------------------|-----------------------------------|
| <b>Col<sub>r</sub>(c2mm), a = 38.5 Å, b = 21.3 Å</b> |                           |                                   |
| <b>hk</b>                                            | <b>d<sub>obs</sub>/ Å</b> | <b>d<sub>theoretical</sub>/ Å</b> |
| <b>11</b>                                            | 18.63                     | 18.63                             |
| <b>20</b>                                            | 19.24                     | 19.24                             |
| <b>2</b>                                             | 10.63                     | 10.65                             |
| <b>22</b>                                            | 9.31                      | 9.31                              |
| <b>40</b>                                            | 9.59                      | 9.62                              |
|                                                      | 4.4br                     |                                   |
| <b>Z</b>                                             | 2.0                       | 2                                 |

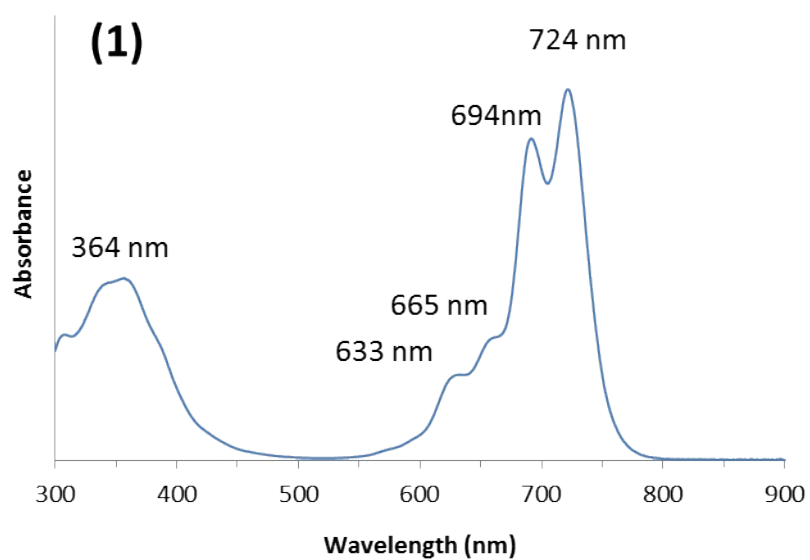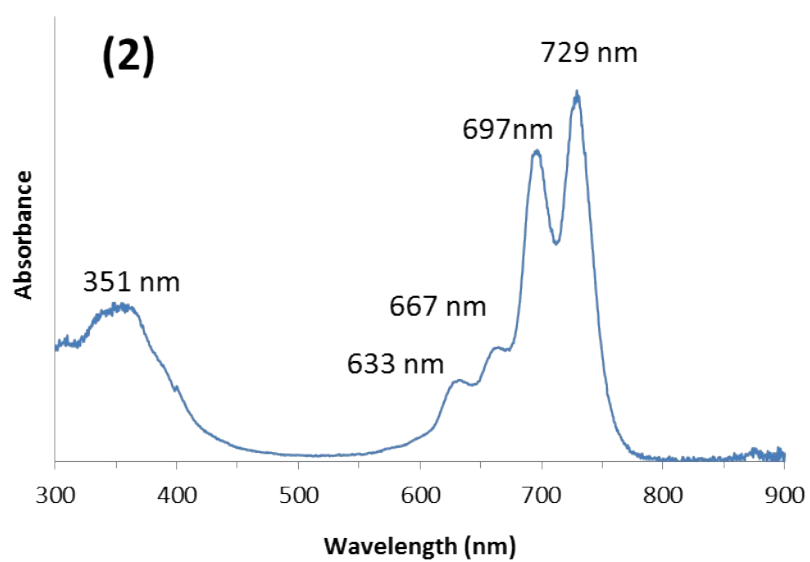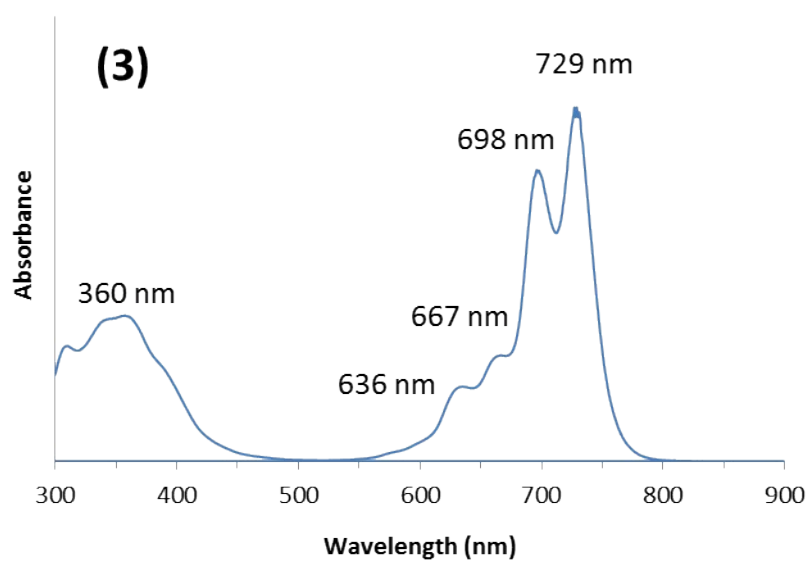

**Fig S1.** Normalised UV-Visible spectra for compounds **1,2** and **3** in THF ( $C=1 \times 10^{-5}M$ )

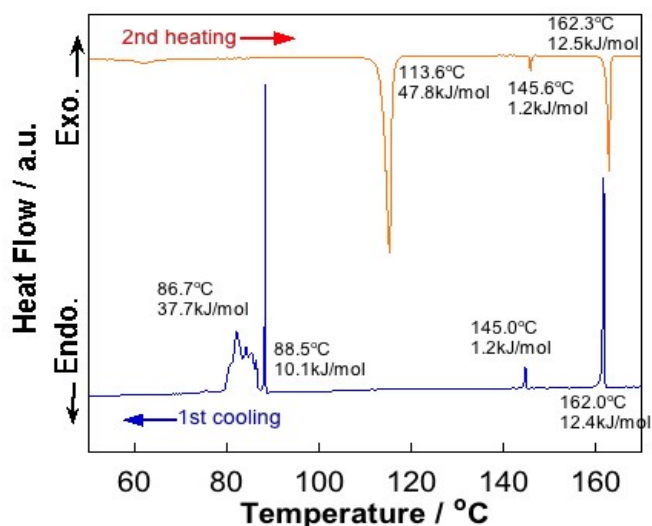

Fig. S2. DSC curves of **3** at 1°C / min of heating and cooling rates.

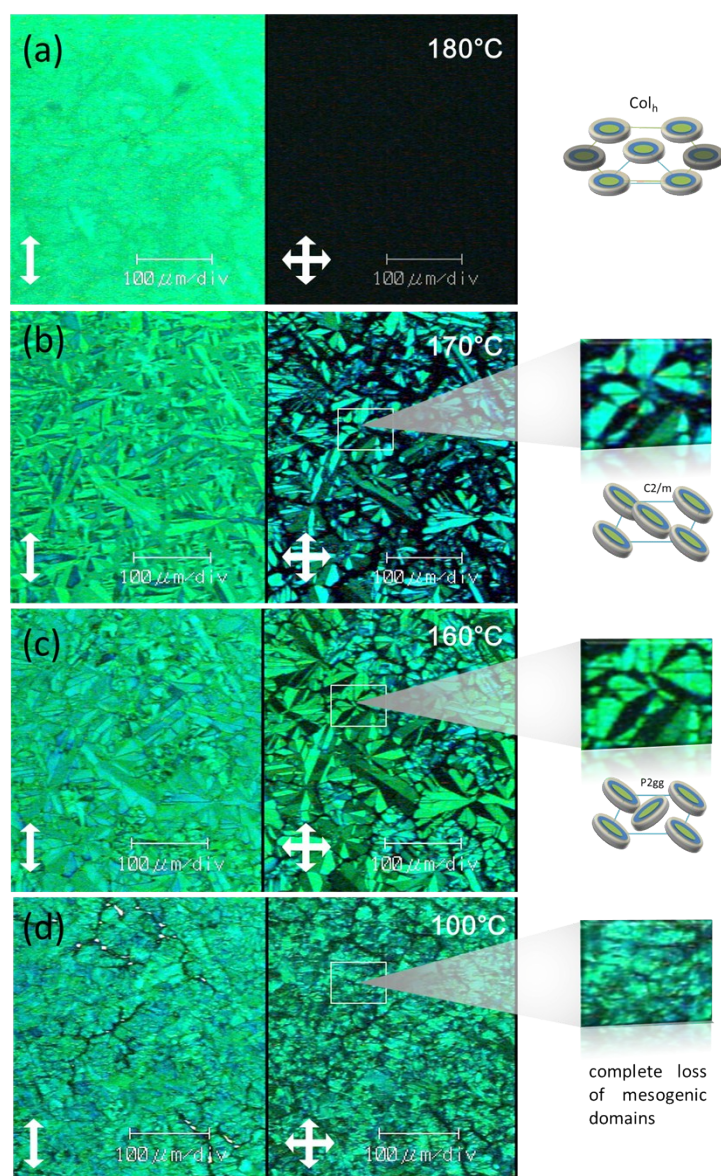

Fig S3. Detailed POM analyses of mesophase textures of **2** upon cooling (1°C/min) from the isotropic phase in which we can observe the homeotropic alignment at the Col<sub>h</sub> phase (a) followed by the Col<sub>r</sub> phase (b) with a *c2mm* symmetry. This Col<sub>r</sub> phase is then rearranges on cooling into *p2gg* (c) clarified by an XRD analysis until reaching its crystalline phase (d).

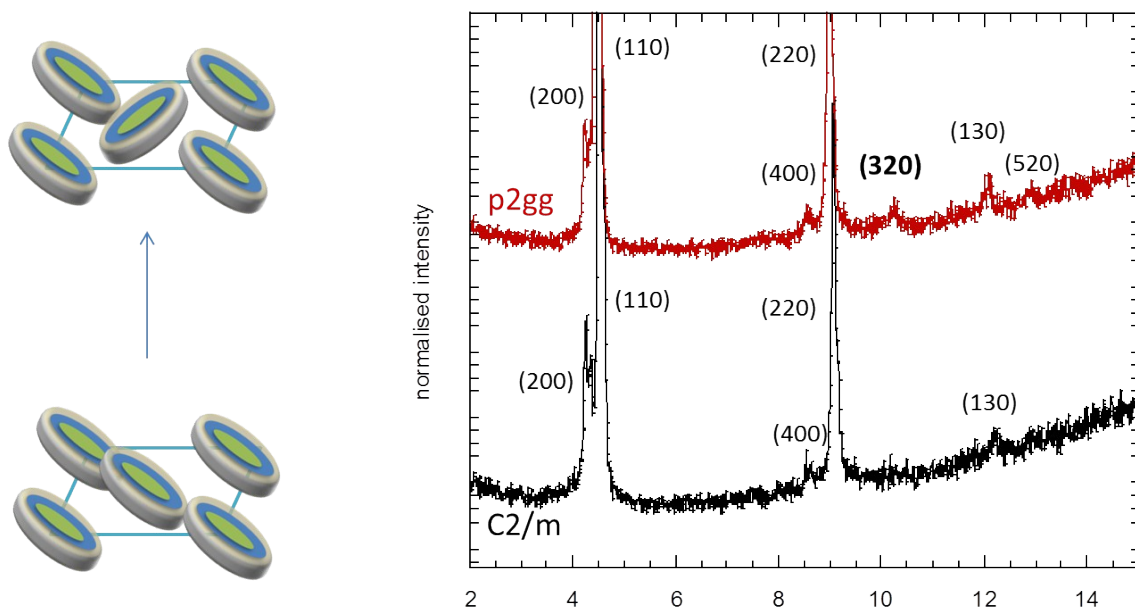

**Fig. S4.** The XRD evidence for the symmetry rearrangement ( $c2mm$  to  $p2gg$ ) occurring in the fluorinated phthalocyanine **2** as the  $c2mm$  symmetry changes to  $p2gg$  one for the  $Col_r$  mesophase upon cooling ( $170$  to  $160^\circ\text{C}$ ).

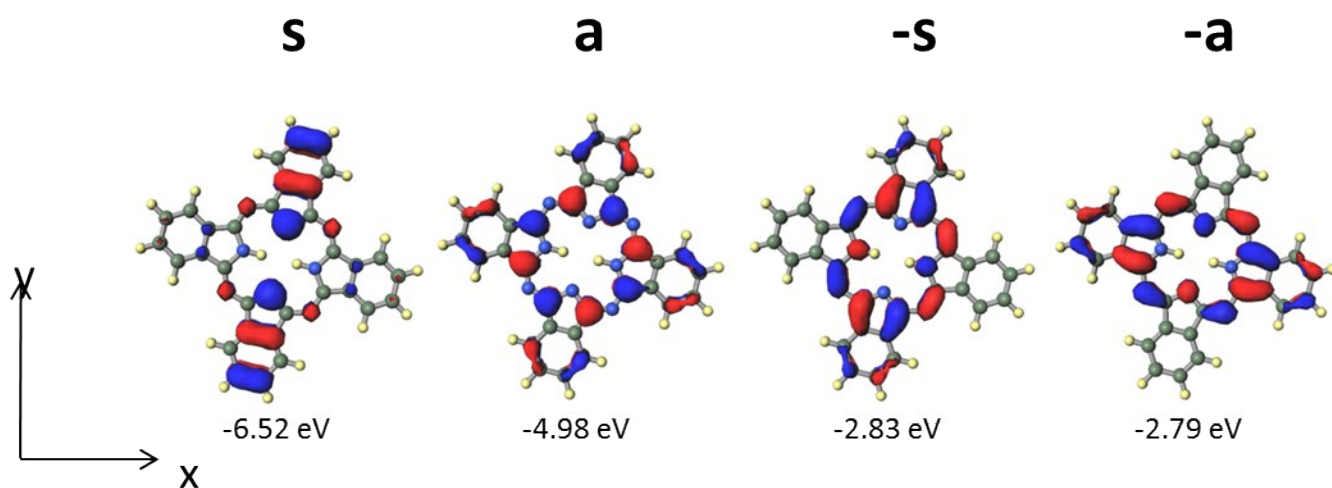

**Fig. S5.** Nodal patterns of the a, s, -a and -s molecular orbitals (HOMO/LUMO) of the non-fluorinated phthalocyanine in B3LYP geometry optimisations with 6-31G(d) basis sets at an iso-surface value of 0.03 au (Q.-D. Dao, L. Sosa-Vargas, T. Higashi, M. Ohmori, H. Itani, A. Fujii, Y. Shimizu and M. Ozaki, submitted.).
